# Supplementary material
Source: PubMed Central journal article supplement (PMC5470420)
Supplement: jamaoncol-3-456-s002.pdf [file jamaoncol-3-456-s002.pdf]

## Supplementary Online Content

Kim SY, An J, Lim Y, Han S, Lee J, et al. MRI with liver-specific contrast for surveillance of patients with cirrhosis at high risk of hepatocellular carcinoma [published online September 22, 2016]. *JAMA Oncology*. doi:10.1001/jamaoncol.2016.3147

**eTable 1. Magnetic resonance imaging categories and scoring criteria for hepatocellular carcinoma.**

**eTable 2. Ultrasonography categories and scoring criteria for hepatocellular carcinoma.**

**eFigure 1. Receiver operating characteristic curves for US and MRI in the detection of overall and very early stage HCC.**

**eTable 3. Factors associated with the false-negative findings of US to detect HCC nodules.**

**eFigure 2. A representative patient with a HCC detected only by gadoxetic acid-enhanced MRI.**

**eFigure 3. The patient with a HCC detected only by US.**

**eFigure 4. A representative patient with a HCC false negative both on US and MRI.**

**eFigure 5. A representative patient with a HCC false negative both on US and MRI.**

**eFigure 6. Receiver operating characteristic curves for US and MRI with or without AFP in the detection of HCC.**

This supplementary material has been provided by the authors to give readers additional information about their work.

**eTable 1. Magnetic resonance imaging categories and scoring criteria for hepatocellular carcinoma.**

| Diagnostic Categories                                                                        | Scoring Criteria                                                               |
|----------------------------------------------------------------------------------------------|--------------------------------------------------------------------------------|
| Highly suggestive (Category 5)                                                               | One of the followings                                                          |
|                                                                                              | Size $\geq$ 1cm AND arterial enhancement AND low SI on portal or delay phase   |
|                                                                                              | Definite tumor thrombus                                                        |
| Suspicious (Category 4)                                                                      | One of the followings                                                          |
|                                                                                              | Size $\geq$ 1cm AND one or more of the followings                              |
|                                                                                              | Arterial enhancement AND low SI on HB phase                                    |
|                                                                                              | Arterial enhancement AND T2 moderate high SI                                   |
|                                                                                              | T2 moderate high SI AND low SI on portal, delayed, or HB phase                 |
|                                                                                              | low SI on portal AND low SI on HB phase                                        |
|                                                                                              | Size < 1cm AND arterial enhancement AND low SI on portal, delayed, or HB phase |
|                                                                                              | Equivocal tumor thrombus                                                       |
| Increase in size $\geq$ 1cm on F/U imaging in the lesion previously classified as Category 3 |                                                                                |
| Equivocal (Category 3)                                                                       | One of the followings                                                          |
|                                                                                              | Size $\geq$ 1cm AND only one of the followings                                 |
|                                                                                              | T2 moderate high SI                                                            |
|                                                                                              | Low SI on portal phase                                                         |
|                                                                                              | Low SI on delayed phase                                                        |
|                                                                                              | Low SI on HB phase,                                                            |
|                                                                                              | Containing fat                                                                 |
| Capsular enhancement on Portal or Delayed phase                                              |                                                                                |
| Probably benign (Category 2)                                                                 | Imaging features suggestive of a benign entity*                                |
| Definitely benign (Category 1)                                                               | Imaging features diagnostic of a benign entity <sup>†</sup>                    |

The likelihood of hepatocellular carcinoma (HCC) was based the Liver Imaging Reporting and Data System, version 1.0 (<http://www.acr.org/Quality-Safety/Resources/LIRADS/Archive>) after modifications.

F/U, follow-up; HB, hepatobiliary; MRI, magnetic resonance imaging; SI, signal intensity.

\*Atypical cyst (or probable cyst), atypical hemangioma (or probable hemangioma), atypical focal fat deposition (or probable focal fat), atypical focal fat sparing (or probable focal fat sparing), hypertrophic pseudomass interpreted as probably benign, rounded perfusional alterations (nodular arterial phase hyperenhancement, NAPH), patchy (changed from "florid") perfusional alterations, atypical confluent fibrosis (probable confluent fibrosis), atypical focal scars (probable focal scars), some arterial-phase non-hyperenhancing atypical nodules progressively enhancing observations which do not meet the criteria in Category 3.

<sup>†</sup>Cyst, hemangioma, focal fat deposition, focal fat sparing, hypertrophic pseudomass interpreted as definitely benign, wedge-shaped perfusional alterations, confluent fibrosis, focal scars, homogeneous siderotic nodules.

**eTable 2. Ultrasonography categories and scoring criteria for hepatocellular carcinoma.**

| Diagnostic Categories                        | Scoring Criteria                                                                                                                               |
|----------------------------------------------|------------------------------------------------------------------------------------------------------------------------------------------------|
| Suspicious (Category 4)                      | One of the followings                                                                                                                          |
|                                              | Size $\geq$ 1cm AND one or more of the followings                                                                                              |
|                                              | Discrete focal mass distinguishable from the adjacent parenchyma                                                                               |
|                                              | Peripheral low echoic halo                                                                                                                     |
|                                              | Mosaic pattern                                                                                                                                 |
| Definite tumor thrombus                      |                                                                                                                                                |
| Equivocal (Category 3)                       | Size < 1cm AND one or more of the followings                                                                                                   |
|                                              | Peripheral halo                                                                                                                                |
|                                              | Mosaic pattern                                                                                                                                 |
| Thrombus (equivocal for benign or malignant) |                                                                                                                                                |
| Probably benign (Category 2)                 | Imaging features suggestive of a benign entity including cyst, hemangioma, focal fat deposition, focal fat sparing, or hypertrophic pseudomass |
| Definitely benign (Category 1)               | Imaging features diagnostic of a benign entity including cyst, hemangioma, focal fat deposition, focal fat sparing, or hypertrophic pseudomass |

The likelihood of hepatocellular carcinoma (HCC) was based on previous work<sup>1-3</sup> after modifications.

References)

1. Tanaka S, Kitamura T, Ohshima A, Umeda K, Okuda S, Ohtani T, Tatsuta M, Yamamoto K. Diagnostic accuracy of ultrasonography for hepatocellular carcinoma. *Cancer*. 1986 Jul 15;58(2):344-7.
2. Teefey SA, Hildeboldt CC, Dehdashti F, Siegel BA, Peters MG, Heiken JP, Brown JJ, McFarland EG, Middleton WD, Balfe DM, Ritter JH. Detection of primary hepatic malignancy in liver transplant candidates: prospective comparison of CT, MR imaging, US, and PET. *Radiology*. 2003 Feb;226(2):533-42.
3. Yu SC, Yeung DT, So NM. Imaging features of hepatocellular carcinoma. *Clin Radiol*. 2004 Feb;59(2):145-56.

**eFigure 1.** Receiver operating characteristic curves for US and MRI in the detection of overall and very early stage HCC

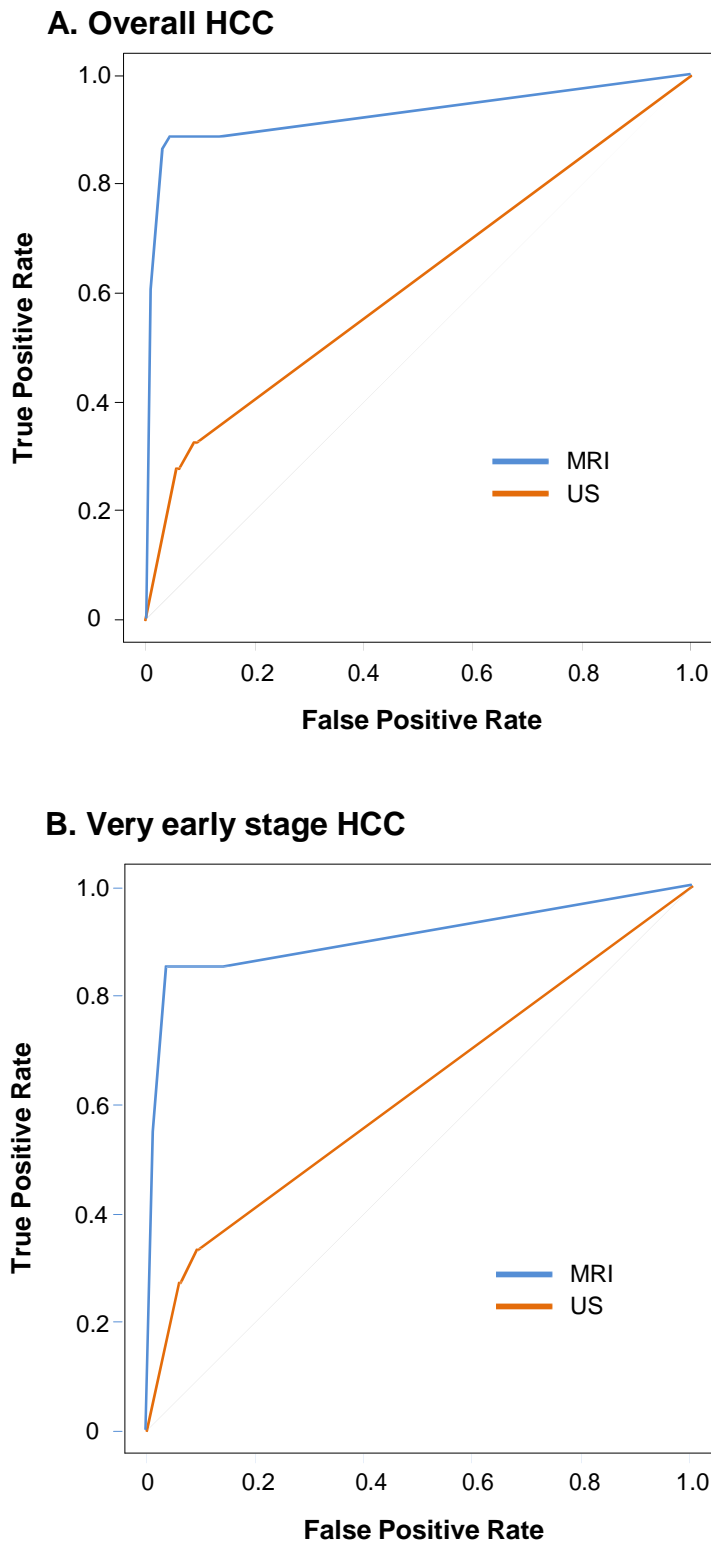

The difference between the area under the curves was significant between MRI and US in the detection of overall HCC (0.93 [95% CI, 0.87–0.98] vs. 0.62 [95% CI, 0.55–0.69];  $P < .001$ ) and very early stage HCC (0.90 [95% CI, 0.83–0.97] vs. 0.62 [95% CI, 0.54–0.71];  $P < .001$ ).

**eTable 3. Factors associated with the false-negative findings of US to detect HCC nodules.**

| Characteristics                | Visible nodules on US (n = 12) | Invisible nodules on US (n = 31) | P    |
|--------------------------------|--------------------------------|----------------------------------|------|
| No. of patients                | 12                             | 31                               |      |
| Age at diagnosis, years        | 62.8 ± 6.8                     | 58.7 ± 6.9                       | .09  |
| Male                           | 9 (75.0%)                      | 20 (64.5%)                       | .72  |
| Body mass index                | 25.6 ± 3.5                     | 24.1 ± 2.7                       | .15  |
| Child-Pugh class A             | 8 (66.7%)                      | 22 (71.0%)                       | >.99 |
| Liver stiffness (kPa)          | 17.6 ± 6.1                     | 16.8 ± 7.7                       | .77  |
| Image factors                  |                                |                                  |      |
| Satisfactory US image quality  | 9 (75.0%)                      | 23 (74.2%)                       | >.99 |
| Satisfactory MRI image quality | 12 (100%)                      | 31 (100%)                        | NA   |
| Tumor size* (cm)               | 1.7 ± 0.7                      | 1.6 ± 0.7                        | .70  |
| Hepatic dome location          | 2 (16.7%)                      | 13 (45.2%)                       | .16  |
| Subcapsular location           | 2 (16.7%)                      | 18 (58.1%)                       | .02  |

Data are n, n (%), or Mean ± standard deviation, unless otherwise specified.

HCC, hepatocellular carcinoma; MRI, magnetic resonance imaging; NA, not applicable; US, ultrasonography

\* Maximum tumor diameter

eFigure 2. A representative patient with a HCC detected only by gadoxetic acid-enhanced MRI

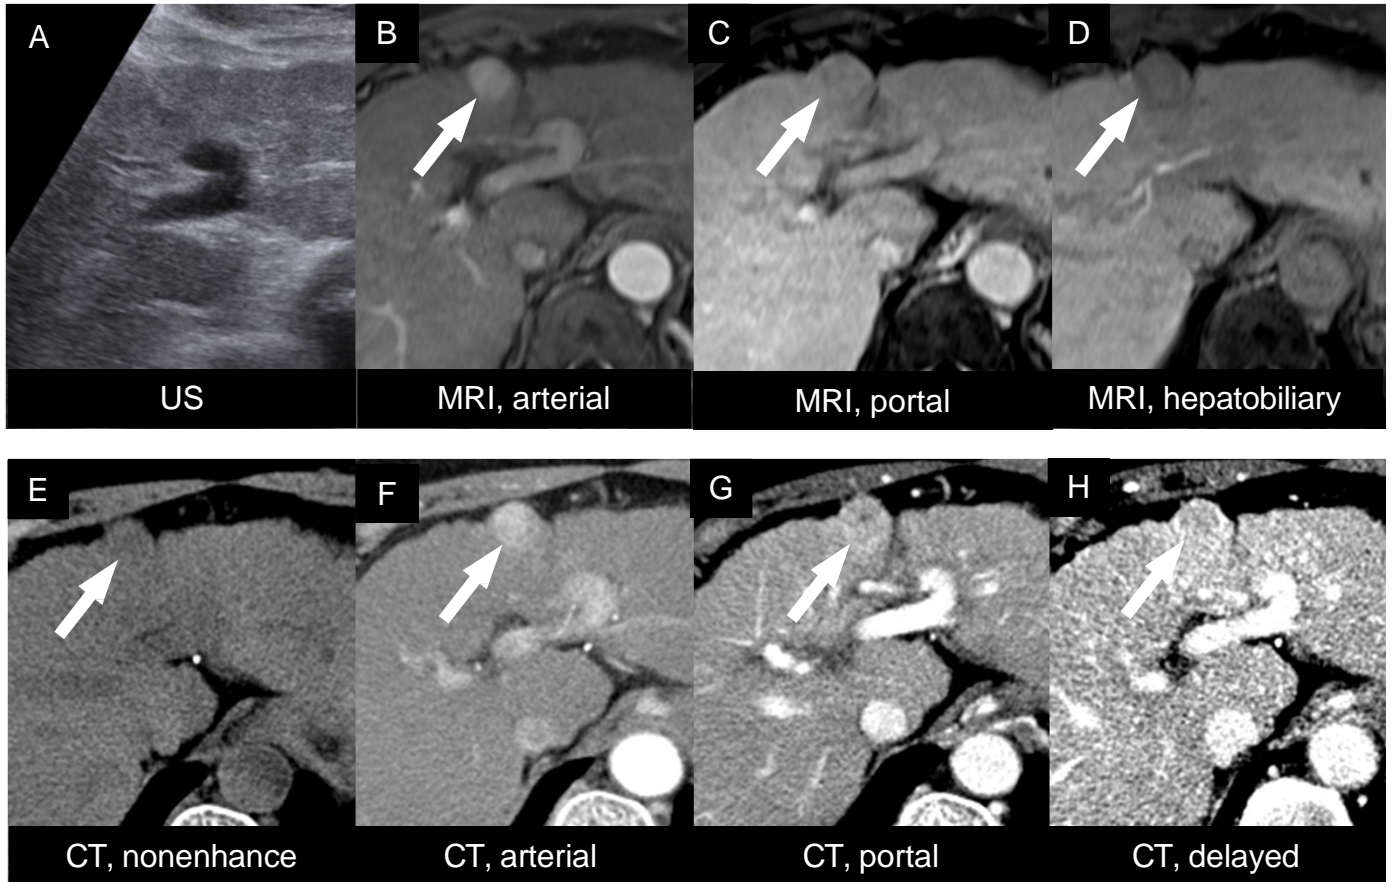

In this 72-year-old woman with hepatitis B-associated cirrhosis, US at Round 2 did not detect any lesions (A). However, gadoxetic acid-enhanced MRI at Round 2 identified a 1.6 cm-sized nodule in the subcapsular area of the left lobe of the liver with features highly suggestive HCC (category 5; B-D, indicated by arrows). A dynamic CT scan as a recall process demonstrated arterial hypervascularity and subtle delayed wash-out and capsular enhancement, and thus, categorized the lesion as HCC (E-H, indicated by arrows). The lesion was confirmed as HCC by surgical pathology.

**eFigure 3. The patient with a HCC detected only by US**

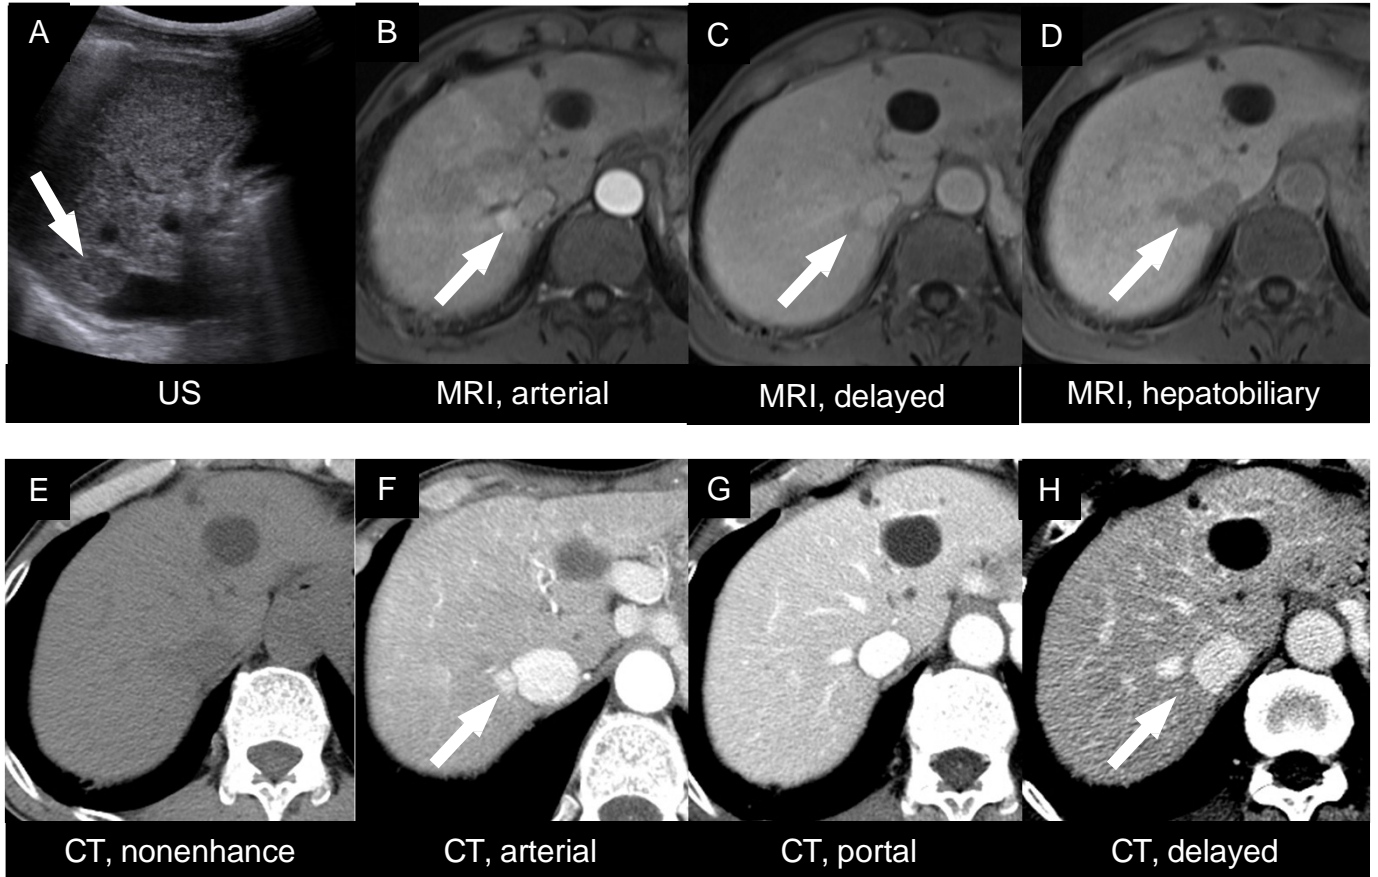

In this 63-year-old man with hepatitis C-associated cirrhosis, US at Round 1 found a 1.5 cm-sized hypoechoic lesion (indicated with arrow) (A). However, initial interpretation of Round 1 gadoteric acid-enhanced MRI missed the lesion, as the lesion was located close to the inferior vena cava and right hepatic vein (B-D). The lesion could be identified on a retrospective review (B-D, indicated by arrows). A dynamic CT scan as a recall process demonstrated arterial hypervascularity and subtle wash-out on the delayed phase, and thus, the lesion was categorized as HCC (E-H, indicated by arrows).

**eFigure 4. A representative patient with a HCC false negative both on US and MRI**

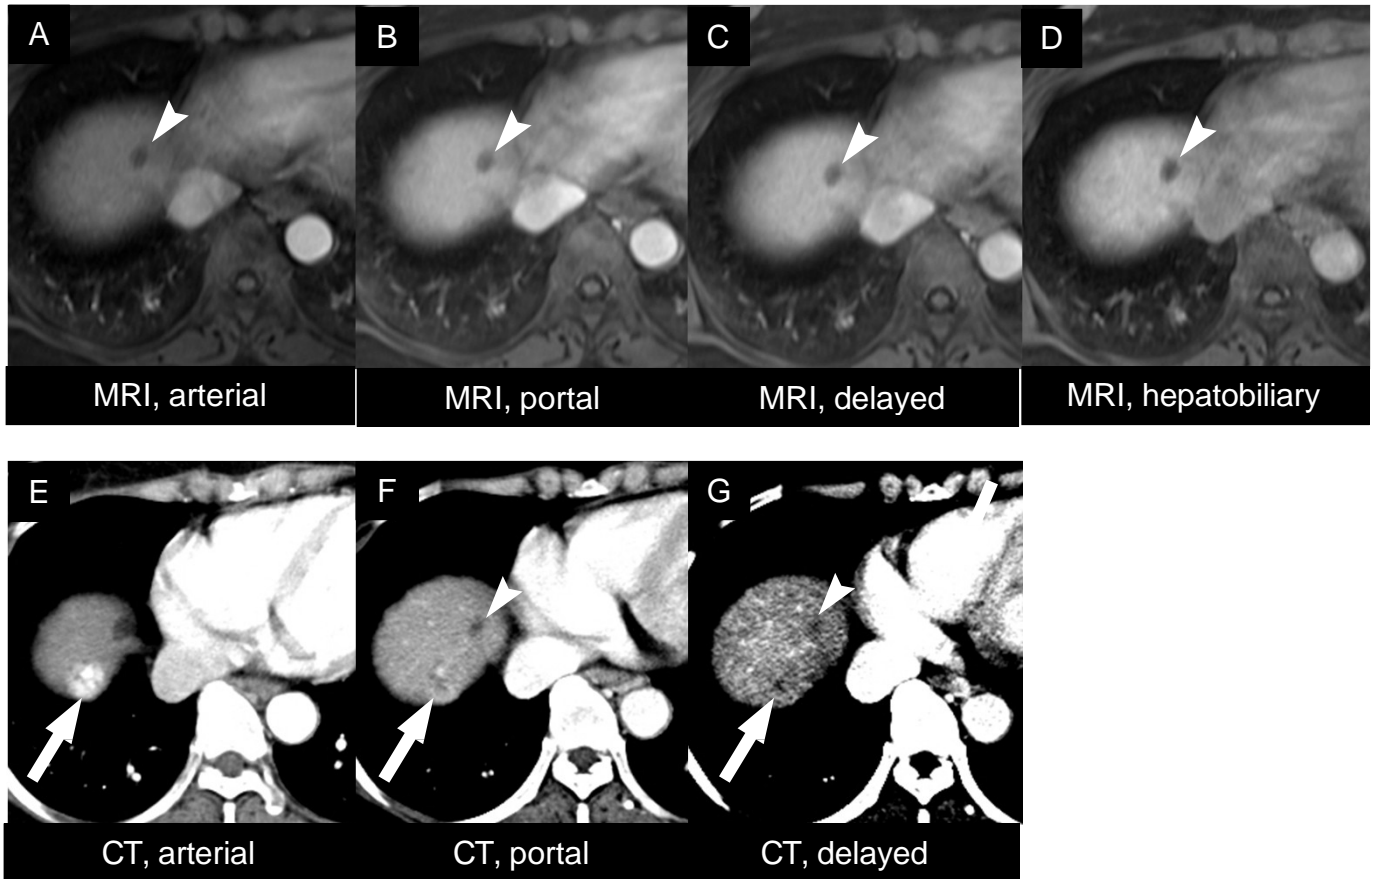

In this 56-year-old woman with hepatitis B-associated cirrhosis, Round 3 gadoteric acid-enhanced MRI did not find any lesion suggestive of HCC (A-D). Another hypointense lesion in right lobe (A-D, indicated with arrowheads) was a hepatic cyst. However, the follow-up CT obtained 6 months after Round 3 MRI identified that a newly-developed 1.8 cm-sized lesion with arterial hypervascularity and wash-out on portal and delayed phase images (E-G, indicated with arrows). Therefore, the lesion was deemed to be incident HCC, which was confirmed later by surgical pathology. The hepatic cyst is also noted (E-G, indicated with arrowheads).



**eFigure 5.** A representative patient with a HCC false negative both on US and MRI

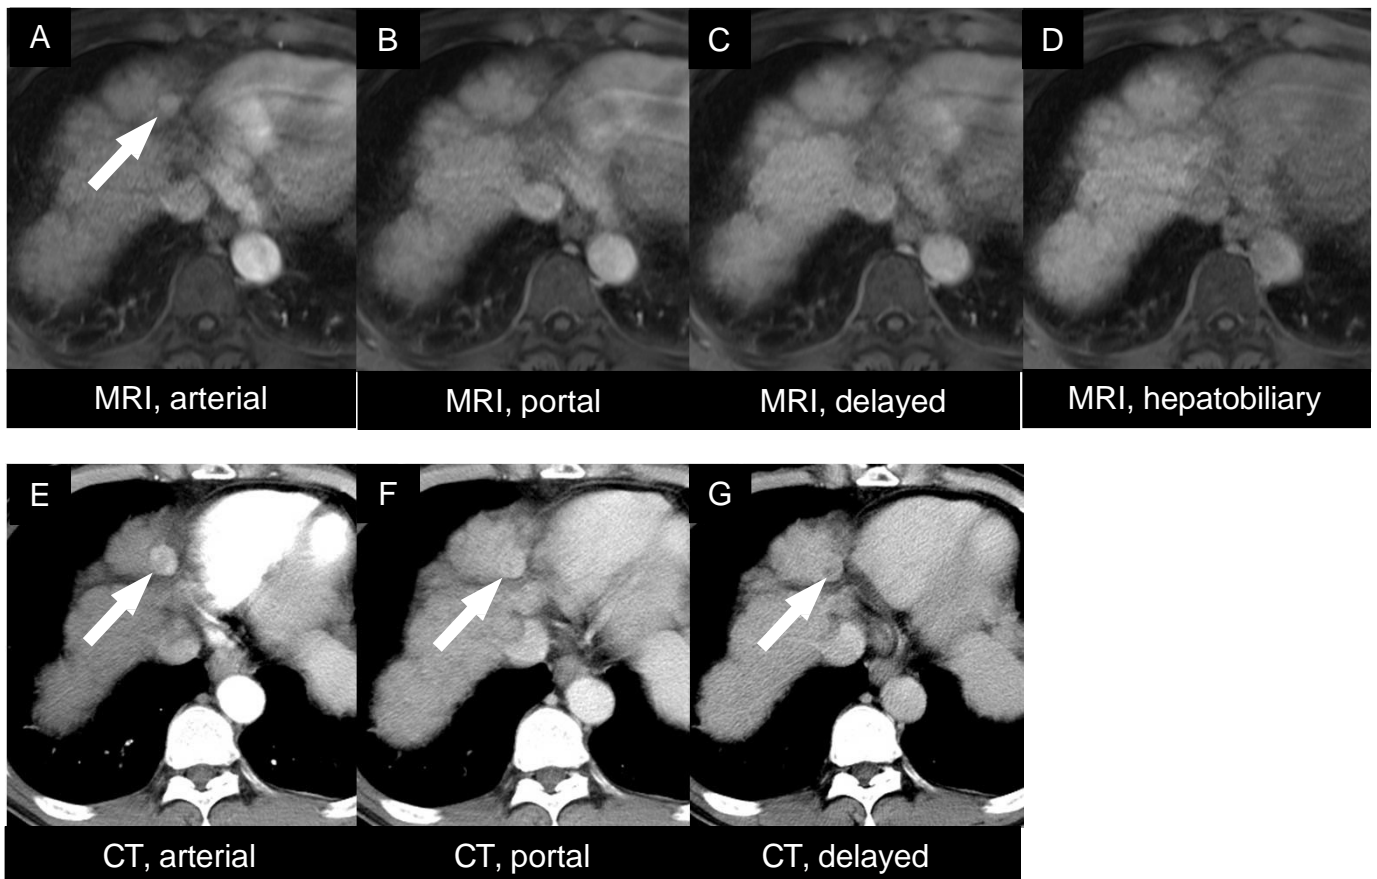

In this 61-year-old man with hepatitis B-associated cirrhosis, Round 3 gadoxetic acid-enhanced MRI detected a 1.2 cm-sized arterial hypervascular nodule (A, indicated with arrow) in right hepatic dome which showed isointensity on portal, delayed, and hepatobiliary phase images (B-D). Thus, the lesion was not regarded as HCC. However, the follow-up CT obtained 6 months after Round 3 MRI found that the lesion showed interval growth up to 1.6 cm in diameter, arterial hypervascularity and wash-out on delayed phase images (E-F, indicated with arrows). The lesion was diagnosed as HCC.

**eFigure 6.** Receiver operating characteristic curves for US and MRI with or without AFP in the detection of HCC

**A. ROC curves of US vs. US+AFP**

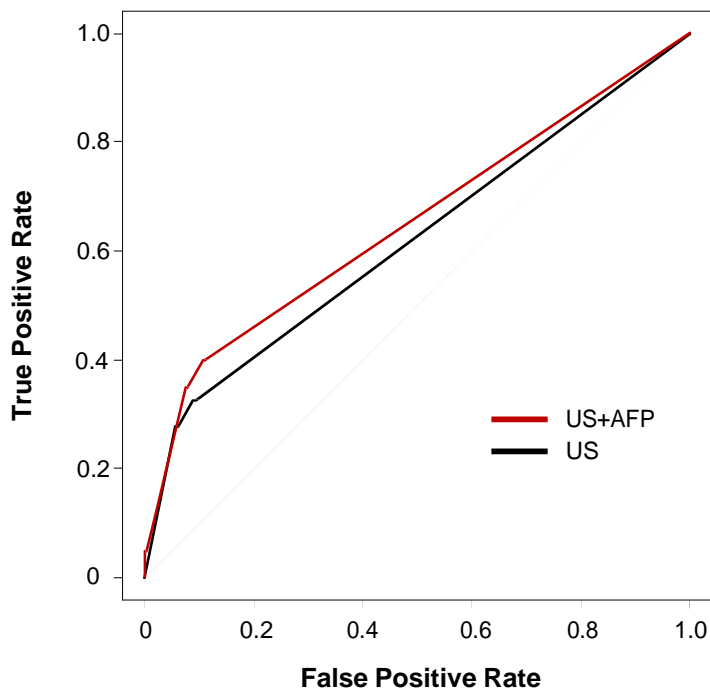

**B. ROC curves of MRI vs. MRI+AFP**

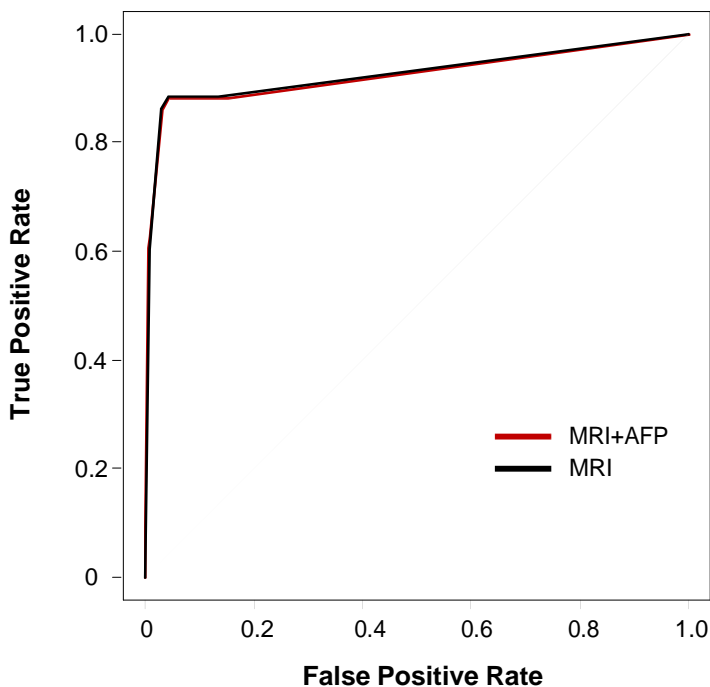

The difference in the area under the curves was significant between US+AFP and US alone (0.65 [95% CI, 0.57–0.73] vs. 0.62 [95% CI, 0.55–0.69];  $P=.049$ ), while it was not significant between MRI+AFP and MRI alone (0.93 [95% CI, 0.87–0.98] vs. 0.93 [95% CI, 0.87–0.98];  $P=.99$ ). The positive screening value of AFP was defined as  $>20$  ng/mL.
